# Supplementary material for: Cooperative Efficiency Evaluation System for Intelligent Transportation Facilities Based on the Variable Weight Matter Element Extension
Source: MDPI journal article supplement (doi:10.3390/su15032411), 2023-01-29
Supplement: s1 [file s1]

**Table S1.** Positive index ranking.

| Index    | Excellent [9-7]           | Good (7-5]               | Medium (5-3]               | Poor (3-1]                  |
|----------|---------------------------|--------------------------|----------------------------|-----------------------------|
| $D_1$    | Comprehensive             | More comprehensive       | Medium                     | Poor                        |
| $D_2$    | Larger                    | Good                     | Medium                     | Small                       |
| $D_4$    | Excellent                 | Good                     | Medium                     | Poor                        |
| $D_5$    | Excellent                 | Good                     | Medium                     | Poor                        |
| $D_6$    | Sufficient                | relatively sufficient    | Medium                     | Insufficient                |
| $D_7$    | strong                    | Relatively strong        | Medium                     | Poor                        |
| $D_8$    | Excellent                 | Good                     | Medium                     | Poor                        |
| $D_9$    | Excellent                 | Good                     | Medium                     | Poor                        |
| $D_{10}$ | Excellent                 | Good                     | Medium                     | Poor                        |
| $D_{11}$ | High autonomy             | Good autonomy            | Medium autonomy            | Poor autonomy               |
| $D_{12}$ | High executability        | Good executability       | Medium executability       | Low executability           |
| $D_{13}$ | high efficiency           | Good efficiency          | Medium efficiency          | Inefficient                 |
| $D_{14}$ | high efficiency           | Good efficiency          | Medium efficiency          | Inefficient                 |
| $D_{15}$ | High registration rate    | Good registration rate   | Medium registration rate   | Low registration rate       |
| $D_{16}$ | Strong interaction        | Good interaction         | Medium interaction         | Poor interaction            |
| $D_{17}$ | Integration capability    | Good integration ability | Medium integration ability | Poor integration capability |
| $D_{18}$ | Strong evaluation ability | Good evaluation ability  | Medium evaluation ability  | Poor evaluation ability     |
| $D_{19}$ | Strong evaluation ability | Good evaluation ability  | Medium evaluation ability  | Poor evaluation ability     |
| $D_{20}$ | Strong evaluation ability | Good evaluation ability  | Medium evaluation ability  | Poor evaluation ability     |
| $D_{21}$ | High efficiency           | Good efficiency          | Medium efficiency          | Inefficiency                |
| $D_{22}$ | Fast                      | Good rate                | Medium speed               | Low speed                   |
| $D_{23}$ | Complete                  | Good complete            | Medium integrity           | Incomplete                  |
| $D_{24}$ | High accuracy             | Good accuracy            | Medium accuracy            | Low accuracy                |
| $D_{25}$ | Timely                    | Good timely              | Medium timely              | Not timely enough           |
| $D_{26}$ | Timely                    | Good timely              | Medium timely              | Not timely enough           |
| $D_{27}$ | High efficiency           | Good efficiency          | Medium efficiency          | Inefficiency                |
| $D_{29}$ | High mergeability         | Good mergeability        | Medium mergeability        | Poor mergeability           |
| $D_{31}$ | Extremely long            | Long                     | Medium                     | Short                       |
| $D_{32}$ | Excellent                 | Good                     | Medium                     | Poor                        |
| $D_{33}$ | Extremely long            | Long                     | Medium                     | Short                       |
| $D_{34}$ | Excellent                 | Good                     | Medium                     | Poor                        |
| $D_{35}$ | Excellent                 | Good                     | Medium                     | Poor                        |
| $D_{36}$ | Excellent                 | Good                     | Medium                     | Poor                        |

**Table S2.** Negative index ranking.

| Index    | Excellent [1-3) | Good [3-5) | Medium [5-7) | Poor [7-9] |
|----------|-----------------|------------|--------------|------------|
| $D_3$    | Low             | Medium     | Good         | High       |
| $D_{28}$ | Low             | Medium     | Good         | High       |
| $D_{30}$ | Low             | Medium     | Good         | High       |
