# Supplementary material for: Cooperative Efficiency Evaluation System for Intelligent Transportation Facilities Based on the Variable Weight Matter Element Extension
Source: MDPI journal article supplement (doi:10.3390/su15032411), 2023-01-29
Supplement: s1 [file s1]

Archive with 1 entries (1 files):
- sustainability-2140517-supplementary.pdf
